# Supplementary material for: Microsecond time-scale kinetics of transient biochemical reactions
Source: PLOS journal article supplement (doi:10.1371/journal.pone.0185888), 2017-10-03
Supplement: S3 (10.1371/journal.pone.0185888.s003) [file journal.pone.0185888.s003]

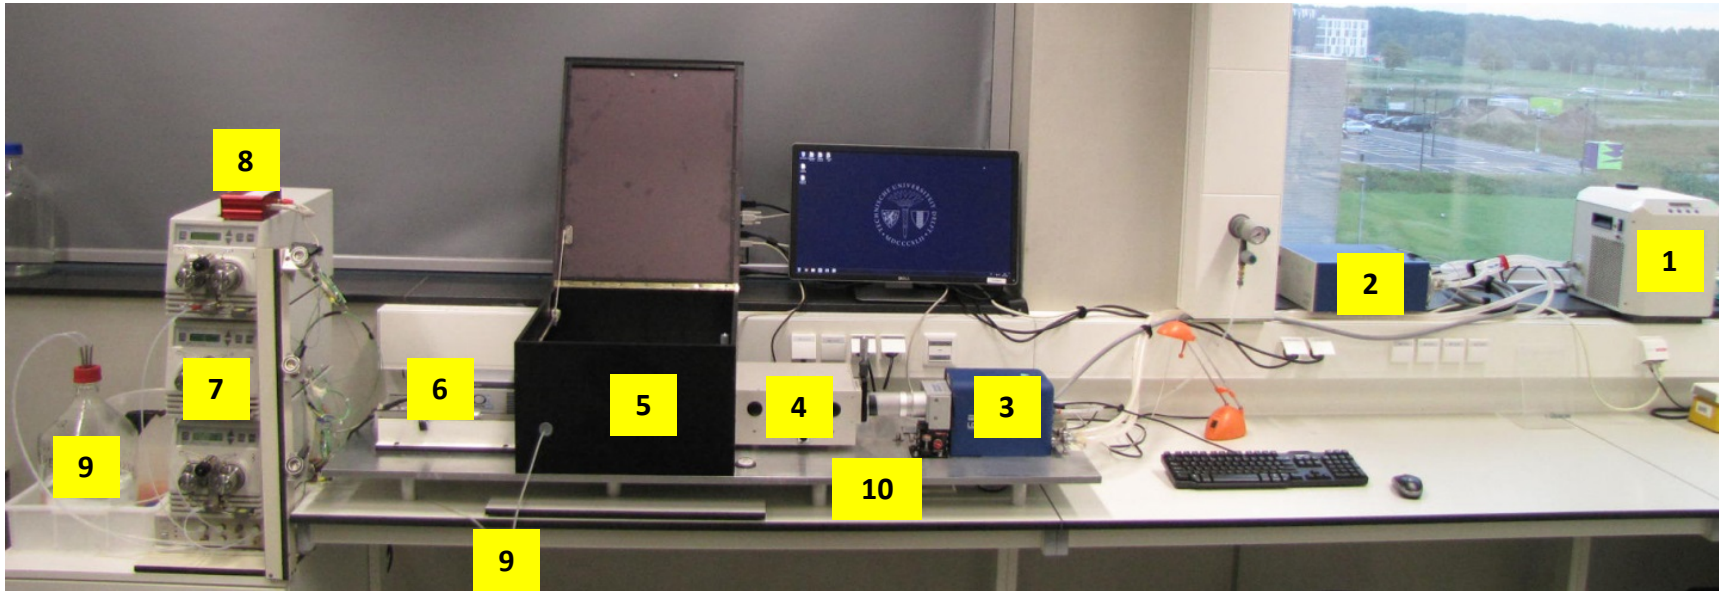

**Picture 1: overview of setup**

- (1) Thermostat of lamp
- (2) Power supply of lamp
- (3) Xenon lamp
- (4) Scanning monochromator
- (5) Enclosure of central optics ( $l \times w \times h = 55 \times 42 \times 26$  cm)
- (6) CCD camera
- (7) HPLC pumps (with injection ports on the right)
- (8) Trigger
- (9) Waste
- (10) Base plate ( $l \times w = 55 \times 153$  cm)

Picture 2: front view

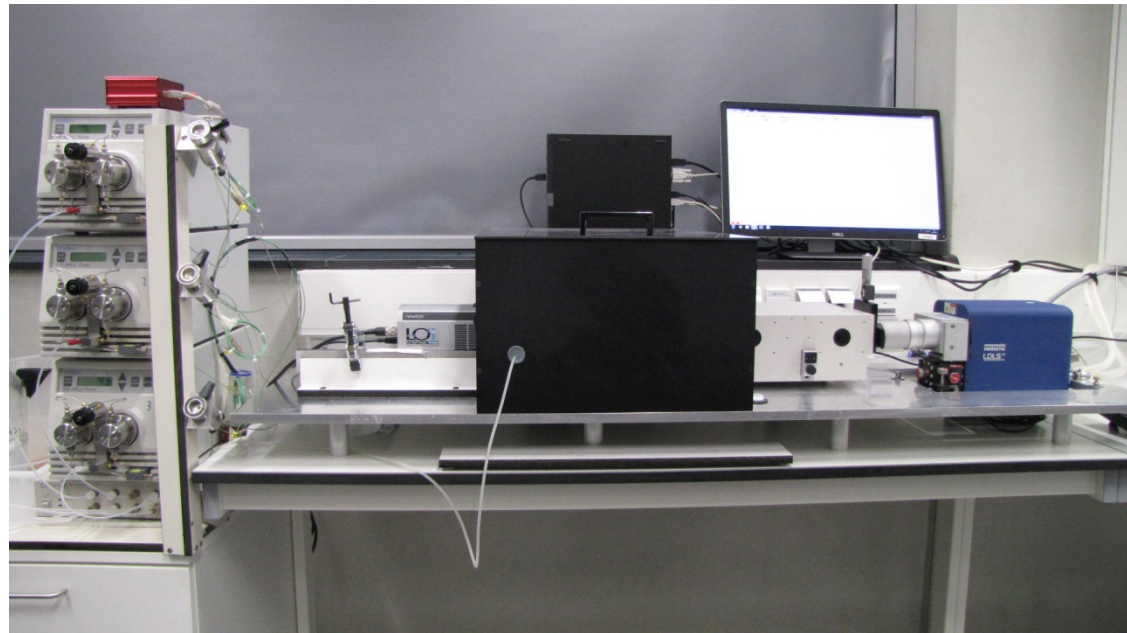

Picture 3: top view

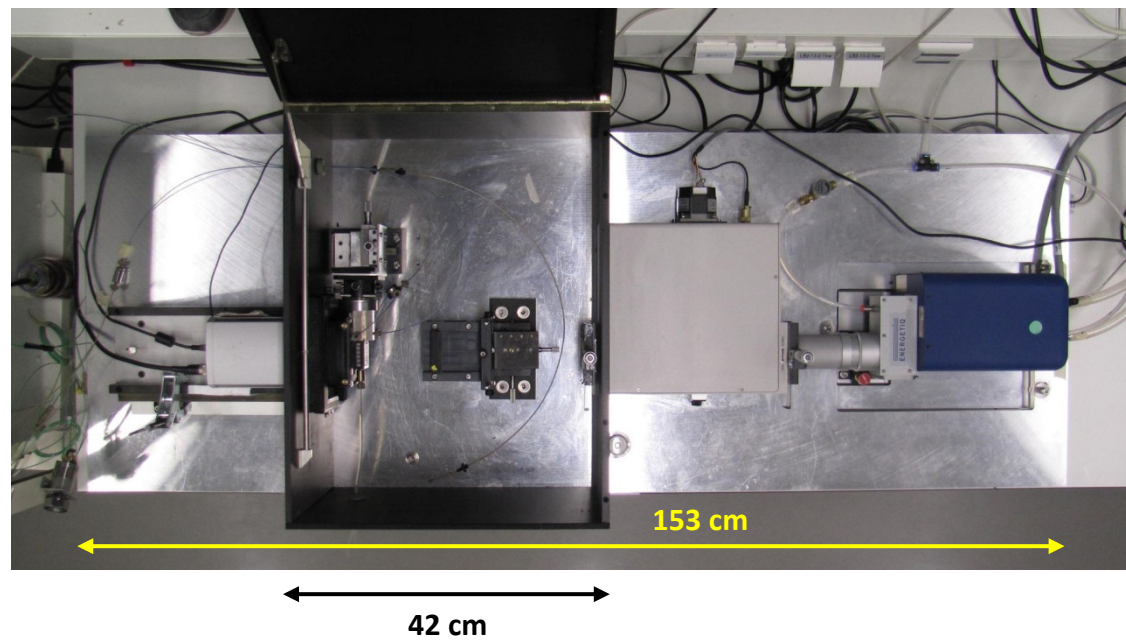

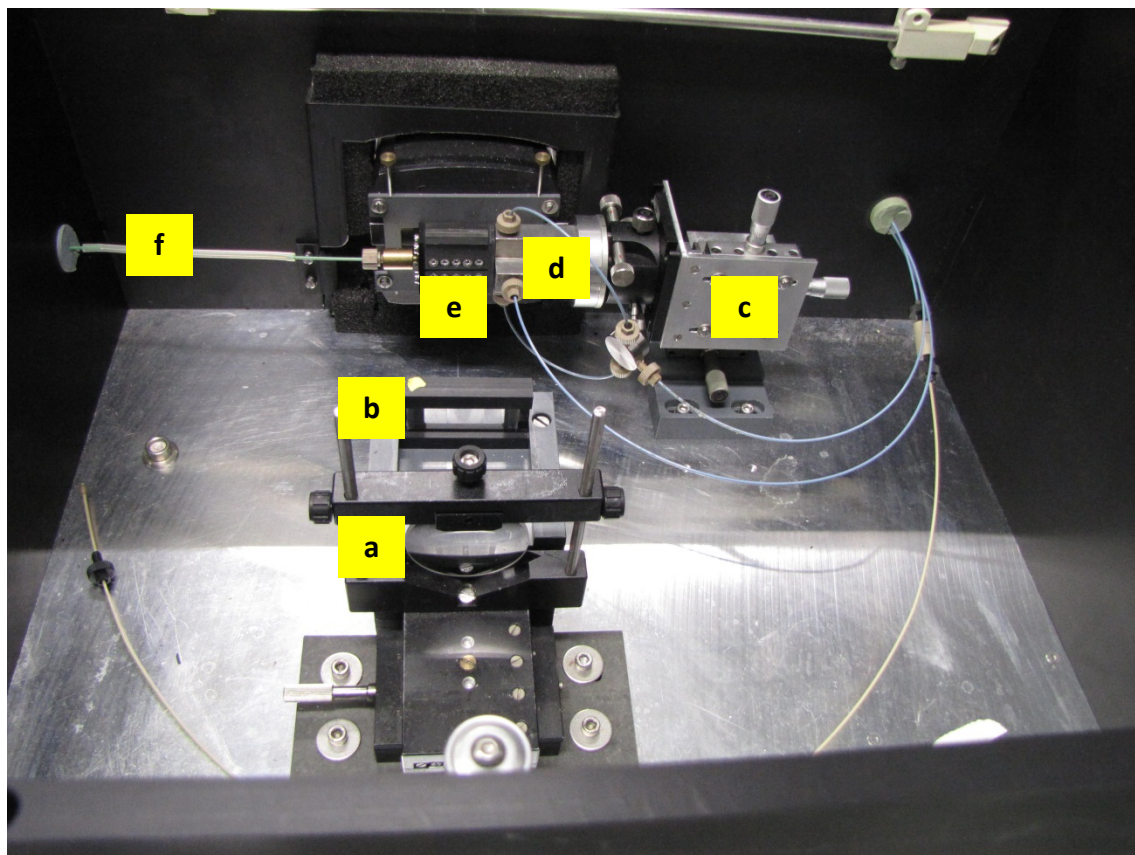

**Picture 4: central optics (view direction from xenon lamp to CCD camera)**

- (a) Bi-convex lens
- (b) Plano-convex lens
- (c) 3D stage
- (d) Mixer housing
- (e) Cuvette housing
- (f) Waste
